# Supplementary material
Source: PubMed Central journal article supplement (PMC4780331)
Supplement: NIHMS718034-supplement-01.pdf [file NIHMS718034-supplement-01.pdf]

## Proteome Analysis

NanoLC-MS/MS—All analyses were performed on nanoLC-LTQ-Orbitrap mass spectrometers (Thermo, San Jose, CA) at a resolution of 60,000. For nanoLC, Eksigent nalo LC 1D plus systems were equipped with 3 mm ReproSil-Pur C18-AQ ((Dr. Maisch GmbH, Ammerbuch) trapping columns (packed in-house, i.d., 150  $\mu$ m; resin, 5  $\mu$ m) and 200 mm ReproSil-Pur C18-AQ (Dr. Maisch GmbH, Ammerbuch) analytical columns (packed in-house, i.d., 75  $\mu$ m; resin, 3  $\mu$ m). Solvents used were 0.5% formic acid water solution (buffer A) and 0.5 % formic acid acetonitrile (ACN) solution (buffer B). Trapping was performed at 2  $\mu$ l/min buffer A for 15 min, and elution was achieved with a gradient of 0–32% B in 80 min, 32–50% B in 6 min, 80% B for 6 min at a flow rate of 300 nL/min. Eluting peptide cations were converted to gas-phase ions by Nanospray Flex ion source with 1.8 kV . The mass spectrometer was operated in the data-dependent mode to automatically switch between MS and MS/MS. Survey full scan MS spectra were acquired from m/z 300 to m/z 1800, and the 10 most intense ions with charge state above 2 and above an intensity threshold 500 were fragmented in the linear ion trap using with normalized collision energy of 35%. For the Orbitrap, the AGC target value was set 1e6 and a maximum fill time for full MS was set 500 ms. Fragment ion spectra were acquired in the LTQ with AGC target value of 3e4 and a maximum fill-time of 150 ms. Dynamic exclusion for selected precursor ions was set at 120 s. lock mass option was enabled for the 462.14658 ion.

Table S1. Transcripts with differential expression (p value &lt; 0.05) in HS-27a and in HS-5

| Number | symbol  | gene accession | decription                                                                                                    | p-value | fold-change |
|--------|---------|----------------|---------------------------------------------------------------------------------------------------------------|---------|-------------|
| 1      | ACVRL1  | NM_000020      | activin A receptor type II-like 1                                                                             | 0.0232  | 1.6303      |
| 2      | ALG5    | NM_013338      | dolichyl-phosphate beta-glucosyltransferase                                                                   | 0.0105  | 2.0100      |
| 3      | ALG6    | NM_013339      | alpha-1,3-glucosyltransferase                                                                                 | 0.0094  | 1.5451      |
| 4      | ANGPT2  | NM_001147      | angiotensinogen 2                                                                                             | 0.0000  | 2.1820      |
| 5      | ARF1    | NM_001024227   | ADP-ribosylation factor 1                                                                                     | 0.0007  | 0.5396      |
| 6      | B3GAT3  | NM_012200      | beta-1,3-glucuronyltransferase 3                                                                              | 0.0131  | 1.6762      |
| 7      | B4GALT1 | NM_001497      | UDP-Gal:betaGlcNAc beta 1,4-galactosyltransferase, polypeptide 1                                              | 0.0005  | 2.7230      |
| 8      | B4GALT3 | NM_001199873   | UDP-Gal:betaGlcNAc beta 1,4-galactosyltransferase, polypeptide 3                                              | 0.0316  | 0.7651      |
| 9      | BDNF    | NM_170735      | brain-derived neurotrophic factor                                                                             | 0.0411  | 2.1718      |
| 10     | BMP1    | NM_001199      | bone morphogenetic protein 1                                                                                  | 0.0123  | 1.9679      |
| 11     | BMP2    | NM_001200      | bone morphogenetic protein 2                                                                                  | 0.0454  | 1.4188      |
| 12     | BMP4    | NM_001202      | bone morphogenetic protein 4                                                                                  | 0.0105  | 5.6399      |
| 13     | BMPR2   | NM_001204      | bone morphogenetic protein receptor, type II (serine/threonine kinase)                                        | 0.0049  | 0.5928      |
| 14     | CD164   | NM_006016      | CD164 molecule, sialomucin                                                                                    | 0.0021  | 0.5161      |
| 15     | CD83    | NM_004233      | CD83 molecule                                                                                                 | 0.0111  | 0.4551      |
| 16     | CLU     | NM_001831      | clusterin                                                                                                     | 0.0037  | 1.8556      |
| 17     | CSPG4   | NM_001897      | chondroitin sulfate proteoglycan 4                                                                            | 0.0002  | 2.8573      |
| 18     | CTBS    | NM_004388      | chitinase, di-N-acetyl-                                                                                       | 0.0048  | 1.6431      |
| 19     | CTNS    | NM_001031681   | cystinosin, lysosomal cystine transporter                                                                     | 0.0146  | 0.6512      |
| 20     | CX3CR1  | NM_001171174   | chemokine (C-X3-C motif) receptor 1                                                                           | 0.0481  | 0.4591      |
| 21     | CXCR4   | NM_001008540   | chemokine (C-X-C motif) receptor 4                                                                            | 0.0488  | 0.4213      |
| 22     | DDB1    | NM_001923      | damage-specific DNA binding protein 1, 127kDa                                                                 | 0.0031  | 0.7772      |
| 23     | DDOST   | NM_005216      | dolichyl-diphosphooligosaccharide--protein glycosyltransferase subunit (non-catalytic)                        | 0.0250  | 1.4168      |
| 24     | DDX5    | NM_004396      | DEAD (Asp-Glu-Ala-Asp) box helicase 5                                                                         | 0.0093  | 0.7302      |
| 25     | DGCR2   | NM_005137      | DiGeorge syndrome critical region gene 2                                                                      | 0.0027  | 1.6079      |
| 26     | DPAGT1  | NM_001382      | dolichyl-phosphate (UDP-N-acetylglucosamine) N-acetylglucosaminophosphotransferase 1 (GlcNAc-1-P transferase) | 0.0018  | 1.5650      |
| 27     | EEF2    | NM_001961      | eukaryotic translation elongation factor 2                                                                    | 0.0048  | 0.5948      |
| 28     | EIF4G2  | NM_001418      | eukaryotic translation initiation factor 4 gamma, 2                                                           | 0.0224  | 1.4780      |
| 29     | EXTL3   | NM_001440      | exostosin-like glycosyltransferase 3                                                                          | 0.0223  | 0.7791      |
| 30     | FGF12   | NM_021032      | fibroblast growth factor 12                                                                                   | 0.0444  | 0.5126      |
| 31     | FGF2    | NM_002006      | fibroblast growth factor 2 (basic)                                                                            | 0.0000  | 0.2209      |
| 32     | FGF5    | NM_004464      | fibroblast growth factor 5                                                                                    | 0.0334  | 0.6119      |
| 33     | FMOD    | NM_002023      | fibromodulin (FMOD)                                                                                           | 0.0006  | 1.8819      |
| 34     | FPGT    | NM_003838      | fucose-1-phosphate guanylyltransferase                                                                        | 0.0017  | 1.6267      |

|    |          |              |                                               |        |         |
|----|----------|--------------|-----------------------------------------------|--------|---------|
|    |          |              | fucosyltransferase 4 (alpha (1,3)             |        |         |
| 35 | FUT4     | NM_002033    | fucosyltransferase, myeloid-specific)         | 0.0305 | 0.7669  |
| 36 | FZD1     | NM_003505    | frizzled class receptor 1                     | 0.0073 | 4.4127  |
| 37 | FZD4     | NM_012193    | frizzled class receptor 4                     | 0.0001 | 11.4969 |
| 38 | FZD6     | NM_003506    | frizzled class receptor 6                     | 0.0093 | 1.4289  |
| 39 | GAA      | NM_000152    | <u>glucosidase, alpha; acid</u>               | 0.0208 | 1.6588  |
|    |          |              | polypeptide N-acetylgalactosaminyltransferase |        |         |
| 40 | GALNT1   | NM_020474    | 1                                             | 0.0001 | 3.5644  |
|    |          |              | polypeptide N-acetylgalactosaminyltransferase |        |         |
| 41 | GALNT3   | NM_004482    | 3                                             | 0.0102 | 2.7903  |
| 42 | GLA      | NM_000169    | galactosidase, alpha                          | 0.0156 | 1.4760  |
| 43 | GLB1     | NM_000404    | galactosidase, beta 1                         | 0.0053 | 1.4922  |
| 44 | GPC1     | NM_002081    | glypican 1                                    | 0.0113 | 1.6411  |
| 45 | GPC3     | NM_001164617 | glypican 3                                    | 0.0000 | 0.2168  |
| 46 | GPC4     | NM_001448    | glypican 4                                    | 0.0053 | 0.3048  |
| 47 | GUSB     | NM_000181    | glucuronidase, beta                           | 0.0005 | 2.6138  |
| 48 | HDLBP    | NM_005336    | high density lipoprotein binding protein      | 0.0022 | 0.4632  |
| 49 | HEXA     | NM_000520    | hexosaminidase A (alpha polypeptide)          | 0.0170 | 2.1401  |
|    |          |              | hepatocyte growth factor (hepapoietin A;      |        |         |
| 50 | HGF      | NM_000601    | scatter factor)                               | 0.0050 | 1.6744  |
| 51 | HK1      | NM_000188    | hexokinase 1 (HK1)                            | 0.0053 | 0.4256  |
| 52 | HPSE     | NM_006665    | heparanase (HPSE)                             | 0.0090 | 3.3304  |
|    |          |              | heparan sulfate (glucosamine)                 |        |         |
| 53 | HS3ST3B1 | NM_006041    | 3-O-sulfotransferase 3B1                      | 0.0001 | 0.1354  |
| 54 | IFITM1   | NM_003641    | interferon induced transmembrane protein 1    | 0.0384 | 2.0131  |
| 55 | IFITM2   | NM_006435    | interferon induced transmembrane protein 2    | 0.0112 | 2.4741  |
| 56 | IGF1R    | NM_000875    | insulin-like growth factor 1 receptor         | 0.0088 | 0.5637  |
| 57 | IGF2R    | NM_000876    | insulin-like growth factor 2 receptor         | 0.0286 | 0.6354  |
| 58 | IGFBP3   | NM_001013398 | insulin-like growth factor binding protein 3  | 0.0001 | 19.5985 |
| 59 | IL10RA   | NM_001558    | interleukin 10 receptor, alpha                | 0.0046 | 0.3984  |
| 60 | IL15     | NM_172175    | interleukin 15                                | 0.0475 | 1.5435  |
| 61 | IL1A     | NM_000575    | interleukin 1, alpha                          | 0.0022 | 0.0304  |
| 62 | IL1B     | NM_000576    | interleukin 1, beta                           | 0.0000 | 0.0206  |
| 63 | IL2RG    | NM_000206    | interleukin 2 receptor, gamma                 | 0.0468 | 0.4730  |
| 64 | IL4R     | NM_001257997 | interleukin 4 receptor                        | 0.0054 | 0.5427  |
| 65 | IL6ST    | NM_001190981 | interleukin 6 signal transducer               | 0.0002 | 0.4061  |
| 66 | IL7R     | NM_002185    | interleukin 7 receptor                        | 0.0000 | 19.4497 |
| 67 | ILF2     | NM_001267809 | interleukin enhancer binding factor 2         | 0.0048 | 0.5562  |
| 68 | ILK      | NM_001014794 | integrin-linked kinase                        | 0.0315 | 1.3726  |
| 69 | INHBA    | NM_002192    | inhibin, beta A                               | 0.0008 | 0.1031  |
| 70 | JAG1     | NM_000214    | jagged 1                                      | 0.0006 | 2.3570  |
| 71 | LAMP2    | NM_001122606 | lysosomal-associated membrane protein 2       | 0.0272 | 1.5585  |
| 72 | LEPR     | NM_002303    | leptin receptor                               | 0.0087 | 2.0899  |

|     |          |              |                                                 |        |         |
|-----|----------|--------------|-------------------------------------------------|--------|---------|
|     |          |              | lectin, galactoside-binding, soluble, 3 binding |        |         |
| 73  | LGALS3BP | NM_005567    | protein                                         | 0.0485 | 0.6530  |
| 74  | LGALS7   | NM_002307    | lectin, galactoside-binding, soluble, 7         | 0.0064 | 0.7125  |
| 75  | LIF      | NM_002309    | leukemia inhibitory factor                      | 0.0022 | 0.1186  |
| 76  | LTA4H    | NM_001256643 | eukotriene A4 hydrolase                         | 0.0442 | 1.4304  |
| 77  | LUM      | NM_002345    | lumican                                         | 0.0166 | 20.5943 |
| 78  | MAN1A2   | NM_006699    | mannosidase, alpha, class 1A, member            | 0.0003 | 1.6048  |
| 79  | MAN1B1   | NM_016219    | mannosidase, alpha, class 1B, member 1          | 0.0023 | 1.7176  |
| 80  | MAN2A1   | NM_002372    | mannosidase, alpha, class 2A, member 1          | 0.0001 | 0.1816  |
| 81  | MAN2A2   | NM_006122    | mannosidase, alpha, class 2A, member 2          | 0.0419 | 2.0416  |
| 82  | MBL2     | NM_000242    | mannose-binding lectin (protein C) 2, soluble   | 0.0000 | 0.2249  |
| 83  | MET      | NM_001127500 | proto-oncogene, receptor tyrosine kinase        | 0.0000 | 9.3319  |
|     |          |              | MFNG O-fucosylpeptide                           |        |         |
| 84  | MFNG     | NM_002405    | 3-beta-N-acetylglucosaminyltransferase          | 0.0282 | 0.5059  |
|     |          |              | mannosyl (alpha-1,6-)-glycoprotein              |        |         |
| 85  | MGAT2    | NM_002408    | beta-1,2-N-acetylglucosaminyltransferase        | 0.0001 | 2.0107  |
|     |          |              | mannosyl (beta-1,4-)-glycoprotein               |        |         |
| 86  | MGAT3    | NM_002409    | beta-1,4-N-acetylglucosaminyltransferase        | 0.0001 | 0.2618  |
|     |          |              | meningioma expressed antigen 5                  |        |         |
| 87  | MGEA5    | NM_001142434 | (hyaluronidase)                                 | 0.0002 | 0.4656  |
| 88  | MPI      | NM_001289157 | mannose phosphate isomerase                     | 0.0070 | 1.6701  |
|     |          |              | N-deacetylase/N-sulfotransferase (heparan       |        |         |
| 89  | NDST2    | NM_003635    | glucosaminyl) 2                                 | 0.0000 | 0.4643  |
| 90  | NEU1     | NM_000434    | sialidase 1                                     | 0.0006 | 2.2314  |
| 91  | NGFR     | NM_002507    | nerve growth factor receptor                    | 0.0417 | 0.6943  |
| 92  | NONO     | NM_001145409 | non-POU domain containing, octamer-binding      | 0.0462 | 0.8189  |
| 93  | OAZ1     | NM_001301020 | ornithine decarboxylase antizyme 1              | 0.0026 | 2.1715  |
|     |          |              | 3'-phosphoadenosine 5'-phosphosulfate           |        |         |
| 94  | PAPSS2   | NM_001015880 | synthase 2                                      | 0.0037 | 0.6168  |
|     |          |              | platelet-derived growth factor receptor, alpha  |        |         |
| 95  | PDGFRA   | NM_006206    | polypeptide                                     | 0.0047 | 3.4092  |
|     |          |              | platelet-derived growth factor receptor, beta   |        |         |
| 96  | PDGFRB   | NM_002609    | polypeptide                                     | 0.0046 | 6.6757  |
| 97  | PEG3     | NM_006210    | paternally expressed 3                          | 0.0060 | 0.2436  |
|     |          |              | phosphatidylinositol glycan anchor              |        |         |
| 98  | PIGC     | NM_002642    | biosynthesis, class C                           | 0.0006 | 0.5248  |
| 99  | PODXL    | NM_005397    | podocalyxin-like                                | 0.0177 | 0.4893  |
| 100 | POMT1    | NM_001136114 | protein-O-mannosyltransferase 1                 | 0.0068 | 1.7687  |
|     |          |              | proteoglycan 2, bone marrow (natural killer     |        |         |
|     |          |              | cell activator, eosinophil granule major basic  |        |         |
| 101 | PRG2     | NM_001243245 | protein)                                        | 0.0015 | 1.9850  |
| 102 | PRG4     | NM_005807    | proteoglycan 4                                  | 0.0004 | 0.4626  |
| 103 | PSEN1    | NM_000021    | presenilin 1                                    | 0.0047 | 1.3395  |
| 104 | PSMB2    | NM_001199780 | proteasome (prosome, macropain) subunit,        | 0.0015 | 1.5885  |

|     |         | beta type, 2                                |                                               |               |
|-----|---------|---------------------------------------------|-----------------------------------------------|---------------|
|     |         | proteasome (prosome, macropain) subunit,    |                                               |               |
| 105 | PSMB3   | NM_002795                                   | beta type, 3                                  | 0.0280 1.4688 |
| 106 | PTMA    | NM_001099285                                | prothymosin, alpha                            | 0.0041 0.1217 |
| 107 | PTN     | NM_002825                                   | pleiotrophin                                  | 0.0273 1.8884 |
| 108 | RPL21   | NM_000982                                   | ribosomal protein L21                         | 0.0021 2.1900 |
| 109 | RPL30   | NM_000989                                   | ribosomal protein L30                         | 0.0102 1.6485 |
| 110 | RPN1    | NM_002950                                   | ribophorin I                                  | 0.0015 1.6606 |
| 111 | RPS11   | NM_001015                                   | ribosomal protein S11                         | 0.0043 0.5843 |
| 112 | RPS5    | NM_001009                                   | ribosomal protein S5                          | 0.0257 1.5233 |
| 113 | RPS6    | NM_001010                                   | ribosomal protein S6                          | 0.0046 0.5787 |
| 114 | S100A10 | NM_002966                                   | S100 calcium binding protein A10              | 0.0040 2.0152 |
| 115 | SDC2    | NM_002998                                   | syndecan 2                                    | 0.0001 3.5068 |
| 116 | SDC4    | NM_002999                                   | syndecan 4                                    | 0.0409 1.7705 |
| 117 | SFRP1   | NM_003012                                   | secreted frizzled-related protein 1           | 0.0068 0.3294 |
| 118 | SOD1    | NM_000454                                   | superoxide dismutase 1, soluble               | 0.0007 1.7724 |
| 119 | SPAG7   | NM_004890                                   | sperm associated antigen 7                    | 0.0306 0.7187 |
| 120 | STS     | NM_000351                                   | steroid sulfatase (microsomal), isozyme S     | 0.0000 4.9218 |
|     |         | sulfotransferase family, cytosolic, 1A,     |                                               |               |
| 121 | SULT1A3 | NM_177552                                   | phenol-preferring, member 3                   | 0.0248 1.2459 |
| 122 | TCEA1   | NM_201437                                   | transcription elongation factor A (SII), 1    | 0.0229 1.4819 |
| 123 | TGFB2   | NM_001135599                                | transforming growth factor, beta 2            | 0.0247 2.9489 |
| 124 | TGFBR2  | NM_003242                                   | transforming growth factor, beta receptor II  | 0.0028 0.5827 |
| 125 | TGFBR3  | NM_001195684                                | transforming growth factor, beta receptor III | 0.0234 0.4331 |
| 126 | UGDH    | NM_001184701                                | UDP-glucose 6-dehydrogenase                   | 0.0008 2.5279 |
| 127 | UGP2    | NM_001001521                                | UDP-glucose pyrophosphorylase 2               | 0.0394 1.4979 |
| 128 | UST     | NM_005715                                   | uronyl-2-sulfotransferase                     | 0.0003 0.3973 |
| 129 | VEGFB   | NM_003377                                   | vascular endothelial growth factor B (VEGFB)  | 0.0296 1.8127 |
|     |         | wingless-type MMTV integration site family, |                                               |               |
| 130 | WNT5A   | NM_003392                                   | member 5A                                     | 0.0000 0.0803 |

Table S2. The lectins and relative intense of HS27a/HS5

| No. | Lectin  | Binding structure                                                                                                                                                | p-value | HS27a/HS5 ratio |
|-----|---------|------------------------------------------------------------------------------------------------------------------------------------------------------------------|---------|-----------------|
| 1   | Jacalin | Gal $\beta$ 1-3GalNAc $\alpha$ -Ser/Thr(T)<br>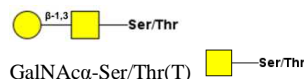<br>GalNAc $\alpha$ -Ser/Thr(T) | 0.002   | 3.243           |
| 2   | ECA     | Gal $\beta$ -1,4GlcNAc<br>                                                    | 0.204   | 0.794           |
| 3   | HHL     | Non-substituted $\alpha$ -1,6 Man<br>                                         | 0.073   | 1.472           |

|    |        |                                                                                                                                                                                                                                                     |       |       |
|----|--------|-----------------------------------------------------------------------------------------------------------------------------------------------------------------------------------------------------------------------------------------------------|-------|-------|
| 4  | WFA    | GalNAc $\alpha$ / $\beta$ 1-3/6Gal                                                                                                                                 | 0.032 | 0.294 |
| 5  | GSL-II | GlcNAc <br>Galactosylated N-glycans                                               | 0.019 | 1.949 |
| 6  | MAL-II | Sia $\alpha$ 2-3Gal $\beta$ 1-4Glc(NAc)                                                                                                                            | 0.096 | 1.793 |
| 7  | PHA-E  | Bisecting GlcNAc and Biantennary N-glycans                                                                                                                         | 0.026 | 0.372 |
| 8  | PTL-I  | $\alpha$ GalNAc and Gal                                                                                                                                            | 0.042 | 2.466 |
| 9  | SJA    | Terminal GalNAc and Gal                                                                                                                                            | 0.060 | 0.538 |
| 10 | PNA    | Gal $\beta$ 1-3GalNAc $\alpha$ -Ser/Thr(T)                                                                                                                         | 0.021 | 1.285 |
| 11 | EEL    | Gal $\alpha$ 1-3(Fuc $\alpha$ 1-2)Gal                                                                                                                              | 0.750 | 0.947 |
| 12 | AAL    | Terminal Fuc $\alpha$ -1,6GlcNAc <br>Fuc $\alpha$ -1,3Gal $\beta$ -1,4GlcNAc  | 0.033 | 0.490 |
| 13 | LTL    | sLe <sup>x</sup> , Le <sup>x</sup> <br>Fuc $\alpha$ -1,3GlcNAc (core)  ;      | 0.016 | 0.783 |
| 14 | MPL    | $\alpha$ GalNAc                                                                                                                                                  | 0.032 | 1.104 |
| 15 | LEL    | Poly-LacNAc <br>(GlcNAc) <sub>n</sub>                                         | 0.016 | 0.271 |
| 16 | GSL-I  | $\alpha$ GalNAc, $\alpha$ Gal <br>GalNAc $\alpha$ -Ser/Thr(Tn)                | 0.507 | 1.088 |

|    |        |                                                                                                                                                                                                                            |       |       |
|----|--------|----------------------------------------------------------------------------------------------------------------------------------------------------------------------------------------------------------------------------|-------|-------|
| 17 | DBA    | GalNAc $\alpha$ -Ser/Thr(Tn) 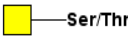<br>GalNAc $\alpha$ 1-3Gal  | 0.227 | 0.874 |
| 18 | LCA    | Fuc $\alpha$ -1,6GlcNAc (core)                                                                                                            | 0.000 | 2.491 |
| 19 | RCA120 | Gal, GalNAc                                                                                                                               | 0.014 | 0.684 |
| 20 | STL    | (GlcNAc) <sub>n</sub>                                                                                                                     | 0.005 | 0.117 |
| 21 | BS-I   | $\alpha$ -Gal, $\alpha$ -GalNAc                                                                                                           | 0.043 | 1.074 |
| 22 | ConA   | Branched and terminal Man, <br>terminal GlcNAc           | 0.000 | 4.758 |
| 23 | PTL-II | Gal                                                                                                                                       | 0.223 | 0.238 |
| 24 | DSA    | GlcNAc                                                                                                                                    | 0.000 | 4.534 |
| 25 | SBA    | Terminal GalNAc (especially GalNAc $\alpha$ 1-3Gal)                                                                                     | 0.001 | 3.532 |
| 26 | VVA    | GalNAc <br>GalNAc $\alpha$ -Ser/Thr(Tn)              | 0.049 | 1.539 |
| 27 | NPA    | Non-substituted $\alpha$ -1,6Man                                                                                                        | 0.016 | 1.302 |
| 28 | PSA    | Fuc $\alpha$ -N-acetylchitobiose-Man                                                                                                    | 0.002 | 1.836 |
| 29 | ACA    | Gal $\beta$ 1-3GalNAc $\alpha$ -Ser/Thr                                                                                                 | 0.677 | 0.924 |
| 30 | WGA    | Multivalent Sia  ;<br>(GlcNAc) <sub>n</sub>          | 0.024 | 1.337 |
| 31 | UEA-I  | Fuc $\alpha$ 1-2Gal $\beta$ 1-4Glc(NAc)                                                                                                 | 0.007 | 1.801 |
| 32 | PWM    | GlcNAc                                                                                                                                  | 0.005 | 0.554 |
| 33 | MAL-I  | Gal $\beta$ -1,4GlcNAc                                                                                                                  | 0.118 | 1.302 |
| 34 | GNA    | Terminal $\alpha$ -1,3 Man                                                                                                              | 0.811 | 1.097 |

|    |         |                                                                                                                                                                                                                                                                                  |       |       |
|----|---------|----------------------------------------------------------------------------------------------------------------------------------------------------------------------------------------------------------------------------------------------------------------------------------|-------|-------|
| 35 | BPL     | Gal $\beta$ 1-3GalNAc 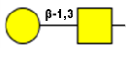                                                                                                                                                                          | 0.964 | 1.016 |
| 36 | PHA-E+L | <p>Bisecting GlcNAc and biantennary</p> <p>N-glycans </p> <p>Tetra-antennary complex-type</p> <p>N-glycan </p> | 0.003 | 3.220 |
| 37 | SNA     | Sia2-6Gal $\beta$ 1-4GlcNAc                                                                                                                                                                     | 0.101 | 0.716 |



Figure S1

A

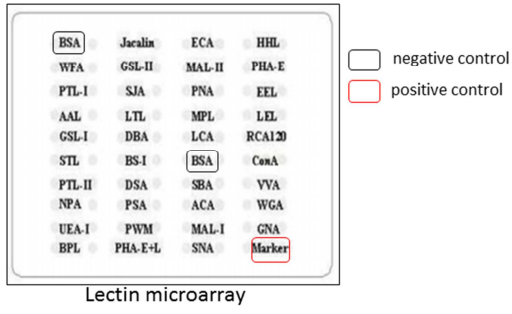

B

HS5

HS27a

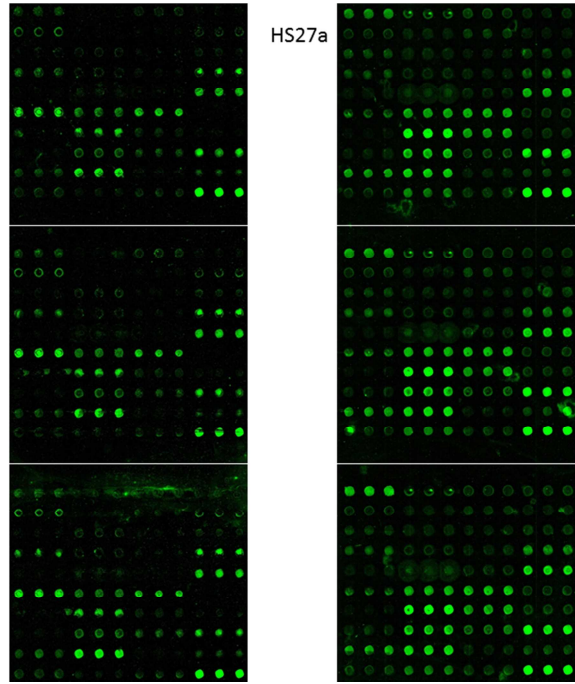

S1: (A) the lectin array; (B) The scanning images of lectin array (three times).
